# Supplementary material
Source: PubMed Central journal article supplement (PMC1472464)
Supplement: pnas_0602469103_1.pdf [file pnas_0602469103_1.pdf]

LeAACD1A **M**GSLSLEMDFEPSPMTPRSLAAMTPKSLARRRFLFPNVDNKKQKMAQIPGAG  
LeAACD1B **M**GSLS**T**LEMDFEPSPMTPRSLAAMTPKSLARRRFLFPNVDNKKQK**V**EQSGAG  
LeAACD2 **M**GSLS**F**E**K**DFEP**S**A**T**TP**R**G**L**AP**P**G-----L**I**VNGDFGEMMR**L**KV**S**STP  
consensus **M**GSLSLEMDFEPSPMTPRSLAAMTPKSLARRRFLFPNVDNKKQK**L** QSGAG

LeAACD1A **P**RK**N**L**E**LEVME**P**A**L**KNDG**P**SLDTILVNYLD**T**LTQ**R**VNYHLGY**P**VNICYDH  
LeAACD1B **P**RK**N**L**Q**LEVME**P**S**L**N**N**NG**P**SLDTILVNYLD**T**LTQ**R**VNYHLGY**P**VNICYDH  
LeAACD2 **T**T**P**RK**N**L**S**V**T**EP**G**KNDG**P**SLD**C**T**L**MNY**I**D**T**LTQ**R**VNYHLGY**P**VNICY**E**H  
consensus **P**RK**N**L**N**LEVME**P** LKNDG**P**SLDTILVNYLD**T**LTQ**R**VNYHLGY**P**VNICYDH

LeAACD1A **Y**A**T**LAPLL**Q**FHLN**C**GD**P**FLQ**N**T**V**DFH**S**KD**F**EVAVLN**W**F**A**KL**W**E**I**E**K**D**Q****Y**  
LeAACD1B **Y**A**S**LAPLL**Q**FHLN**C**GD**P**FLQ**N**T**V**DFH**S**KD**F**EVAVL**D**W**F**AK**L**W**E**IE**K**D**Q****Y**  
LeAACD2 **Y**A**N**LAPLL**Q**FHLN**C**GD**P**FLQ**N**T**V**DFH**S**KD**F**EVAVLN**W**F**A**D**L**W**E**IE**R**D**Q****Y**  
consensus **Y**A**S**LAPLL**Q**FHLN**C**GD**P**FLQ**N**T**V**DFH**S**KD**F**EVAVLN**W**F**A**KL**W**E**I**E**K**D**Q****Y**

LeAACD1A **W**G**Y**VTNGG**T**E**G**N**L**H**G**I**L**L**G**RE**L**L**P**E**G**I**L**Y**A**S**K**D**S**H**S**Y**V**F**K**A**A**R**M**Y**R**M**D**S**E**  
LeAACD1B **W**G**Y**VTNGG**T**E**G**N**L**H**G**I**L**L**G**RE**L**L**P**E**G**I**L**Y**A**S**K**D**S**H**S**Y**V**F**K**A**A**R**M**Y**R**M**D**S**E**  
LeAACD2 **W**G**Y**VTNGG**T**E**G**N**L**H**G**I**L**L**G**RE**L**L**F**P**D**G**I**L**Y**A**S**K**D**S**H**S**Y**V**A**K**A**A**M**Y**R**M**D****F**E  
consensus **W**G**Y**VTNGG**T**E**G**N**L**H**G**I**L**L**G**RE**L**L**P**E**G**I**L**Y**A**S**K**D**S**H**S**Y**V**F**K**A**A**R**M**Y**R**M**D**S**E**

LeAACD1A **T**I**N**T**S**V**N**G**E**M**D**Y**S**D**L**R**A**K**L**L**Q**N**K**D**K**P**A**I**I**N**V**T**I**G**T**T**F**K**G**A**I**D**D**L**D**V**I**L**E**I  
LeAACD1B **T**I**N**T**S**V**T**G**E**M**D**Y**S**D**L**R**A**K**L**L**Q**N**K**D**K**P**A**I**I**N**V**T**I**G**T**T**F**K**G**A**I**D**D**L**D**V**I**L**E**T  
LeAACD2 **N**I**N**A**S**T**I**N**G**E**I**D**Y**S**D**L**K**V**K**L**L**Q**N**K**G**K**P**A**I**I**N**V**T**I**G**T**T**F**K**G**A**V**D**D**L**D**V**I**L**Q**I**  
consensus **T**I**N**T**S**V**N**G**E**M**D**Y**S**D**L**R**A**K**L**L**Q**N**K**D**K**P**A**I**I**N**V**T**I**G**T**T**F**K**G**A**I**D**D**L**D**V**I**L**E**I

LeAACD1A **L**K**E**C**G**Y**S**Q**D**R**F**Y**I**H**C**D**A**L**C**L**M**T**P**F**I**N**N**M**I**S**F**K**K**P**I**G**S**V**T**I**S**G**H**K**F**L**G**C  
LeAACD1B **L**K**E**C**G**Y**S**Q**D**R**F**Y**I**H**C**D**A**L**C**L**M**T**P**F**I**N**N**M**I**S**F**K**K**P**I**G**S**V**T**I**S**G**H**K**F**L**G**C  
LeAACD2 **L****E****E**C**G**Y**T**R**D**Q**F**Y**I**H**C**D**A**L**N**G**L**I**I**P**F**I**K**N**M**I**T**F**K**K**P**I**G**S**V**T**I**S**G**H**K**F**L**G**C**  
consensus **L**K**E**C**G**Y**S**Q**D**R**F**Y**I**H**C**D**A**L**C**L**M**T**P**F**I**N**N**M**I**S**F**K**K**P**I**G**S**V**T**I**S**G**H**K**F**L**G**C

LeAACD1A **P**M**P**C**G**V**Q**I**T**R**K**S**Y**I**N**N**L**S**T**N**V**E**Y**I**A**S**V**D**A**T**I**S**G**S**R**N**G**L**T**P**I**F**L**W**S**L**S**A**K**  
LeAACD1B **P**M**P**C**G**V**Q**I**T**R**K**S**Y**I**N**N**L**S**T**N**V**E**Y**I**A**S**V**D**A**T**I**S**G**S**R**N**G**L**T**P**I**F**L**W**S**L**S**A**K**  
LeAACD2 **P**M**P**C**G**V**Q**I**T**R**K**S**Y**I**N**N**L**S**R**R**V**E**Y**I**A**S**V**D**A**T**I**S**G**S**R**N**G**L**T**P**I**F**L**W**S****I**S**A**K  
consensus **P**M**P**C**G**V**Q**I**T**R**K**S**Y**I**N**N**L**S**T**N**V**E**Y**I**A**S**V**D**A**T**I**S**G**S**R**N**G**L**T**P**I**F**L**W**S**L**S**A**K**

LeAACD1A **G**Q**V**GL**Q**K**D**V**K**R**C**L**D**N**A**K**Y**L**K**D**R**L**Q**Q**A**G**I**S**V**M**L**N**E**L**S**I**I**V**V**L**E**R**P**R**D**H**E**F**V**  
LeAACD1B **G**Q**V**GL**Q**K**D**V**K**R**C**L**D**N**A**K**Y**L**K****N**R**L**Q**Q**A**G**I**S**V**M**L**N**E**L**S**I**I**V**V**L**E**R**P**R**D**H**E**F**V  
LeAACD2 **G**Q**I**G**F**Q**K**D**V**K**R**C**F**D**N**A**K**Y**L**K**D**R**L**Q**Q**A**G**I**S**V**M**L**N**E**L**S**I**I**V**V**L**E**R**P**R**D**H**E**F**V  
consensus **G**Q**V**GL**Q**K**D**V**K**R**C**L**D**N**A**K**Y**L**K**D**R**L**Q**Q**A**G**I**S**V**M**L**N**E**L**S**I**I**V**V**L**E**R**P**R**D**H**E**F**V**

LeAACD1A **R**R**W**Q**L**S**C**V**K**D**M**A**H**V**I**V**M**P**G**I**T**R**E**M**L**D**N**F**M**S**E**L**V**Q**Q**R**K**V**W**Y**Q**N**G**K**T**D**P**P**C**V  
LeAACD1B **R**R**W**Q**L**S**C**V**K**D**M**A**H**V**I**V**M**P**G**I**T**R**E**M**L**D**N**F**V**S**E**L**V**Q**Q**R**K**Q**W**Y**R**D**G**K**A**E**A**P**C**V  
LeAACD2 **R**R**W**Q**L**S**C**V**R**D**M**A**H**V**I**V**M**P**G**I**T**R**E****T**L**D**G**F**I**N**D**L**I**Q**Q**R**K**K**W**Y**Q**D**G**R**I**S**P**P**C**V**  
consensus **R**R**W**Q**L**S**C**V**K**D**M**A**H**V**I**V**M**P**G**I**T**R**E**M**L**D**N**F**I**S**E**L**V**Q**Q**R**K** W**Y**Q**D**G**K** D**P**P**C**V

LeAACD1A **G**E**D**I**G**A**Q**N**C**A**C**S**Y**H**K**I**D**Y**I****C**P  
LeAACD1B **G**E**D**I**G**A**Q**N**C**A**C**S**Y**H**K**I**D**Y**I****C**P  
LeAACD2 **A**N**D**I**G**A**Q**N**C**A**C**S**Y**H**K**I**D**Y**I****I**A  
consensus **G**E**D**I**G**A**Q**N**C**A**C**S**Y**H**K**I**D**Y**I** P
